# Supplementary material for: Comparison of Two Diagnostic Assays for the Detection of Serum Neutralizing Antibody to Porcine Epidemic Diarrhea Virus
Source: MDPI journal article supplement (doi:10.3390/ani13040757), 2023-02-20

Figure S1: Negative and Positive Assay Results

No virus neutralization  
(Negative)

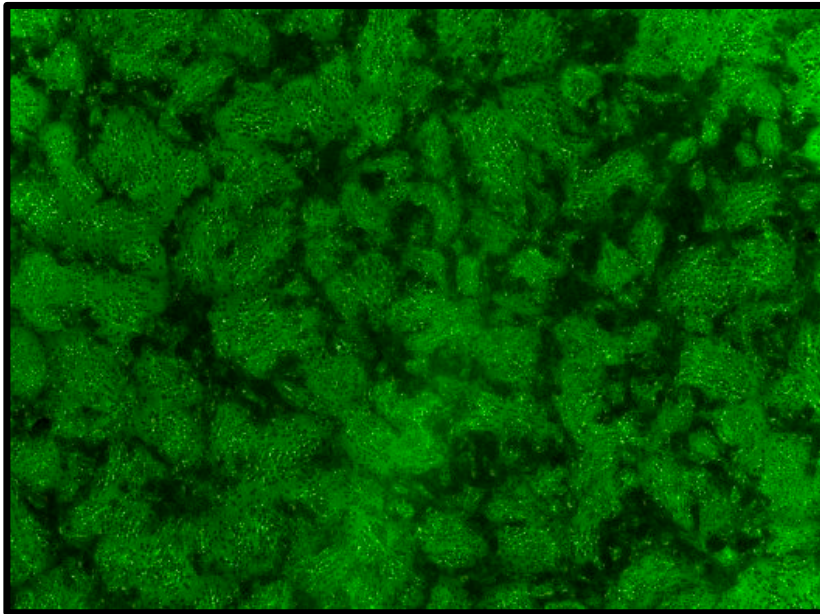

Virus neutralization  
(Positive)

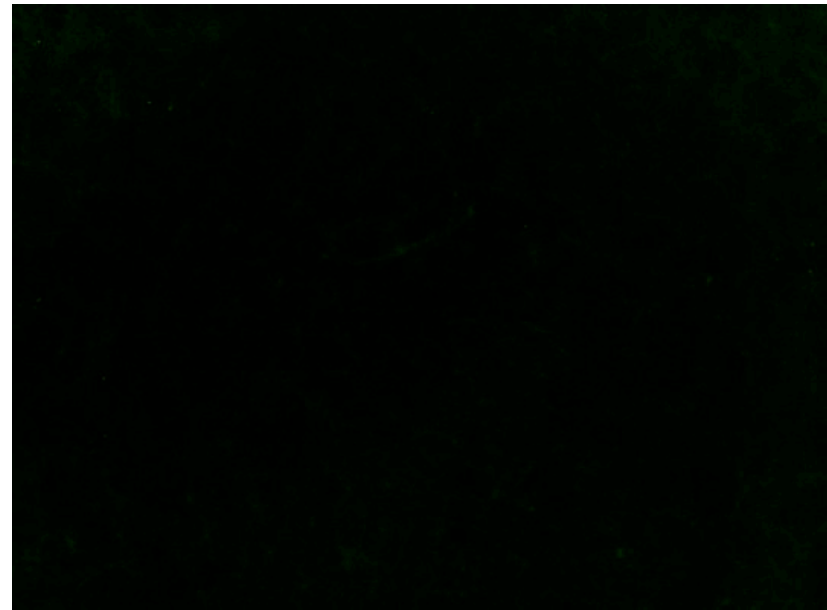

Supplement: s1 [file s1]
